# Supplementary material
Source: Research Square preprint supplement (doi:10.21203/rs.3.rs-9039113/v1)
Supplement: Supplementary file 5 [file e78a1cb05015544033018cf2.docx]

**Supplementary Table 2: Questionnaire for pharmacists for workload and screening metrics**

| **Question** | **Answer Options** |
| --- | --- |
| How long did it take to reach the recruitment target in your pharmacy? | <1 month, 1–3 months, 3 months, 3-6 months, not reached |
| How many patients visit your pharmacy per week on average? | <400, 400-800, 800-1200, >1200 |
| How many patients were screened per month on average during the project? | <5, 5–9, 10–19, 20–29, ≥30 |
| What proportion of approached patients agreed to participate in the screening? | <10%, 10-25%, 25-50%, 50-75%, >75% |
| How much time did the screening process take on average per patient (including testing, history taking, informed consent, documentation) for you and your team? | <20 minutes, 20-30 minutes, 30-45 minutes, >45 minutes |
| How much time did the project implementation take? | <2 hours, 2-4 hours, >4 hours |
| How would you rate the overall workload of the screening process for your team? | Very low, Low, Moderate, High, Very high |
